# Supplementary material for: Solution-processable perylene diimide-based electron transport materials as non-fullerene alternatives for inverted perovskite solar cells
Source: Royal Society of Chemistry journal article supplement (doi:10.1039/d2ta01321e), 2022-01-01
Supplement: d2ta01321e1.pdf [file d2ta01321e1.pdf]

Supporting information:

Journal: Journal of Materials Chemistry A

Title:

**Solution-processable perylene diimide-based electron transport materials as non-fullerene alternatives for inverted perovskite solar cells**

German Soto Perez,<sup>a</sup> Shyantana Dasgupta,<sup>b,c</sup> Wiktor Żuraw,<sup>b</sup> Rosinda Fuentes Pineda,<sup>c</sup> Konrad Wojciechowski,<sup>b,c</sup> Lethy Krishnan Jagadamma,<sup>d</sup> Ifor Samuel<sup>d</sup> and Neil Robertson<sup>\*a</sup>

<sup>a</sup> School of Chemistry, Kings Buildings, University of Edinburgh, Edinburgh, EH9 3JJ, UK. E-mail: neil.robertson@ed.ac.uk.

<sup>b</sup> Saule Research Institute, Wrocław PL 54-130, Poland.

<sup>c</sup> Saule Technologies, Wrocław PL 54-427, Poland.

<sup>d</sup> Organic Semiconductor Centre, SUPA, School of Physics and Astronomy, University of St Andrews, St Andrews, KY16 9SS, UK.

<sup>e</sup> Faculty of Materials Engineering and Technical Physics, Poznań University of Technology Piotrowo 3, 60-965 Poznań, Poland.

**Sample characterisation**

Chemical characterisation of PDI was carried out using the following equipment: NMR spectroscopy was measured on a Bruker Avance spectrometer (500 MHz) with chemical shifts ( $\delta$ ) reported in ppm. Mass spectrometry was measured on a Micro-Tof through electrospray ionisation (ESI). UV-Vis absorption spectra were measured in a Jasco V-670 spectrophotometer. Solution characterisation was carried out in seven different solutions of each molecule (concentrations from  $3.7 \times 10^{-5}$  M to  $3.7 \times 10^{-6}$  M) prepared in  $\text{CHCl}_3$  and measured in a 1 cm quartz cuvette at room temperature. Emission spectra were recorded in solution with a concentration of  $9 \times 10^{-4}$  M ( $\sim 1$  mg/ml) using a Fluoromax-3 fluorometer. Electrochemical characterisation was measured with an Autolab type III potentiostat in an electrochemical cell composed of a platinum working electrode, platinum rod counter electrode and Ag/AgCl reference electrode. The electrochemical measurements were carried out in a 0.1 M solution of [TBA] [PF<sub>6</sub>] in DCM purged with N<sub>2</sub> at room temperature. Ferrocene was used as an internal standard. Density Functional Theory (DFT) calculations were carried out using Gaussian 09 software with the hybrid B3LYP functional and the standard 6-31G(d) basis set, in vacuum conditions.

**Figure S1 NMR Spectra**

PDI-1

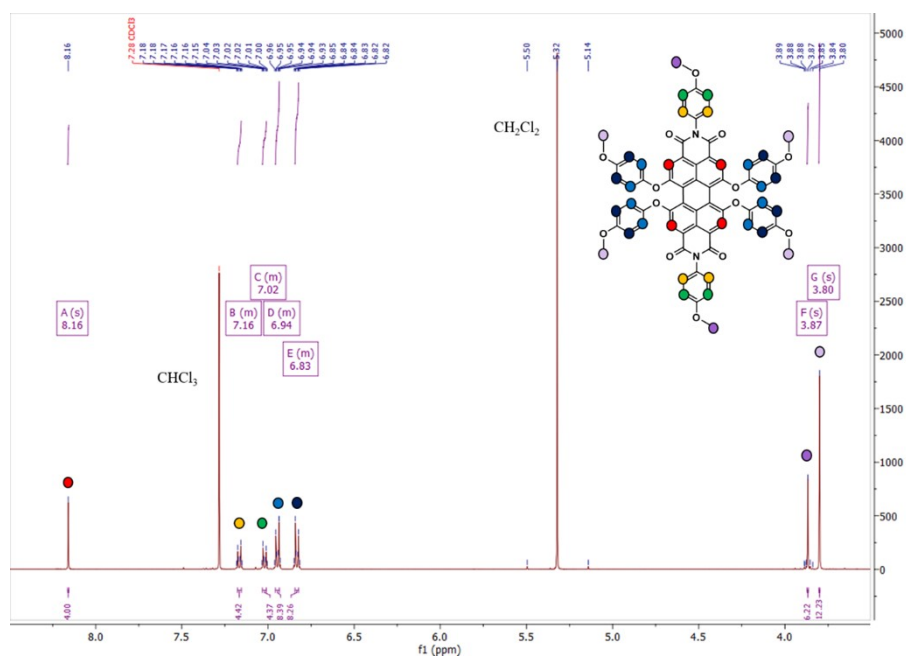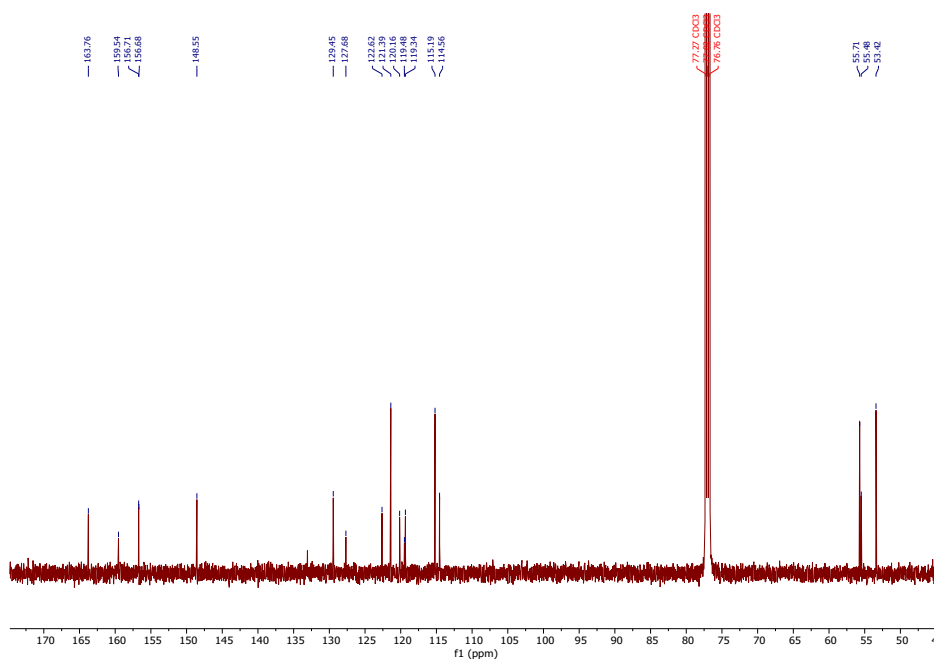

## PDI-2

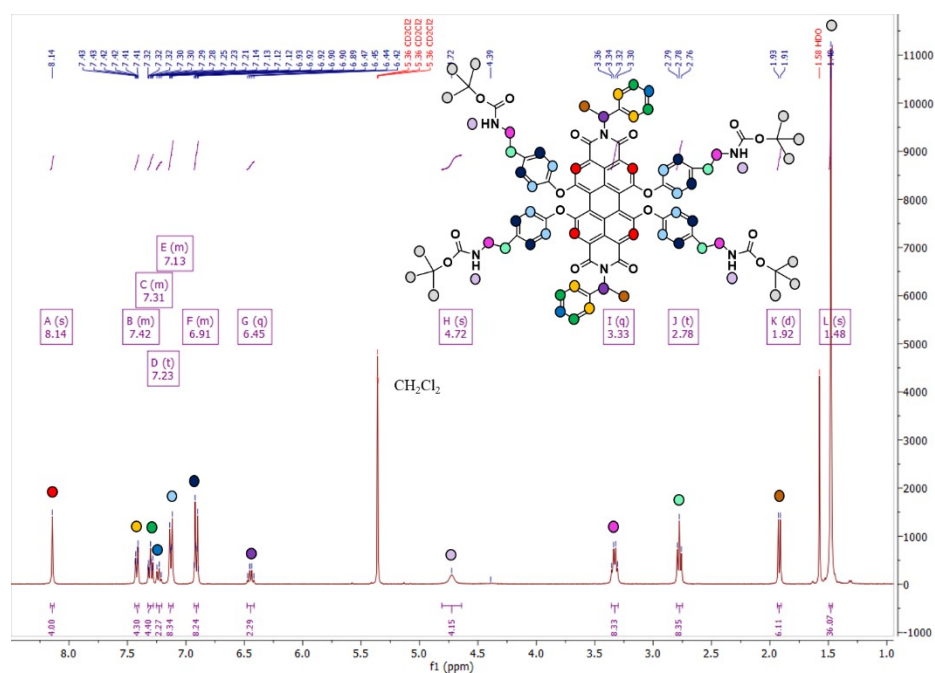

<sup>1</sup>H NMR (400 MHz, Methylene Chloride-d<sub>2</sub>)  $\delta$  8.14 (s, 4H), 7.44 – 7.40 (m, 4H), 7.33 – 7.28 (m, 4H), 7.23 (t,  $J$  = 7.3 Hz, 2H), 7.15 – 7.11 (m, 8H), 6.93 – 6.89 (m, 8H), 6.45 (q,  $J$  = 7.0 Hz, 2H), 4.72 (s, 4H), 3.33 (q,  $J$  = 6.8 Hz, 8H), 2.78 (t,  $J$  = 7.1 Hz, 8H), 1.92 (d,  $J$  = 7.1 Hz, 6H), 1.48 (s, 36H).

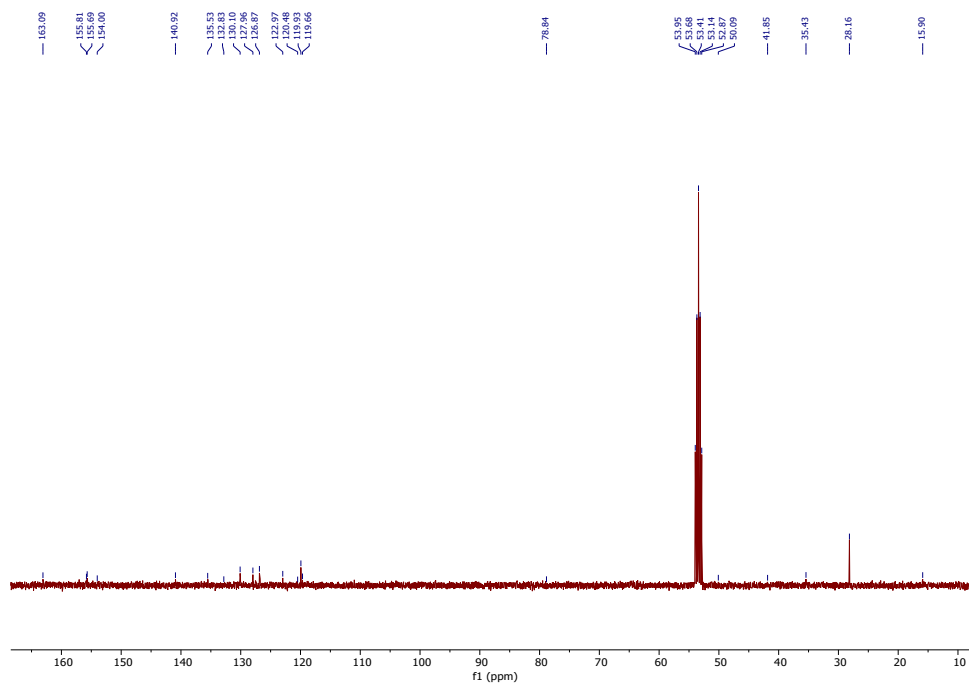

<sup>13</sup>C NMR (126 MHz, Methylene Chloride-d<sub>2</sub>)  $\delta$  163.09, 155.81, 155.69, 154.00, 140.92, 135.53, 132.83, 130.10, 127.96, 126.87, 122.97, 120.48, 119.93, 119.66, 78.84, 52.87, 50.09, 41.85, 35.45, 28.16, 15.90.

## PDI-3

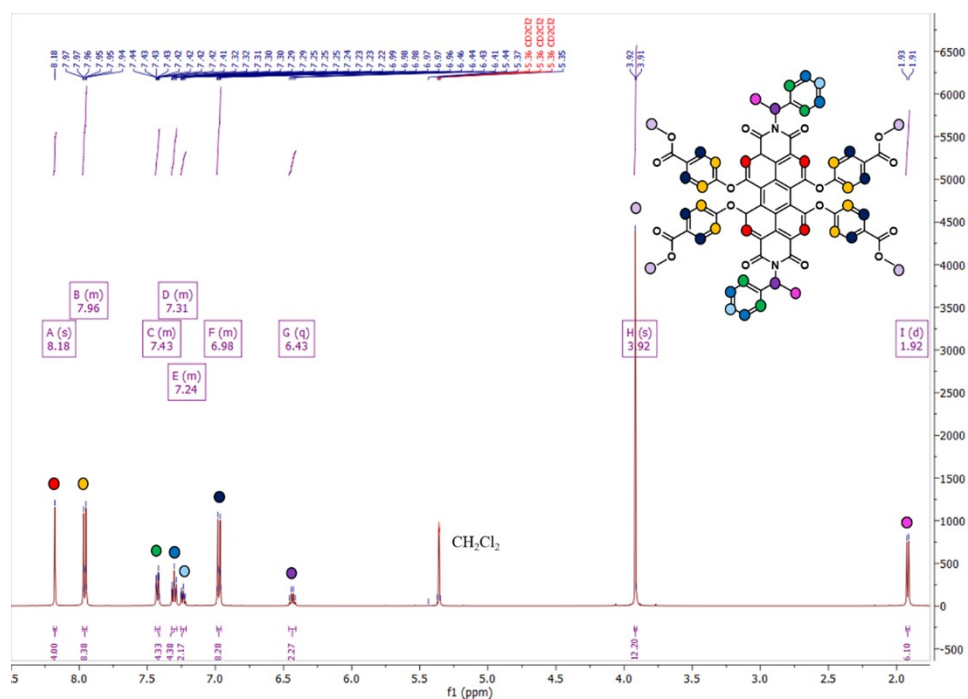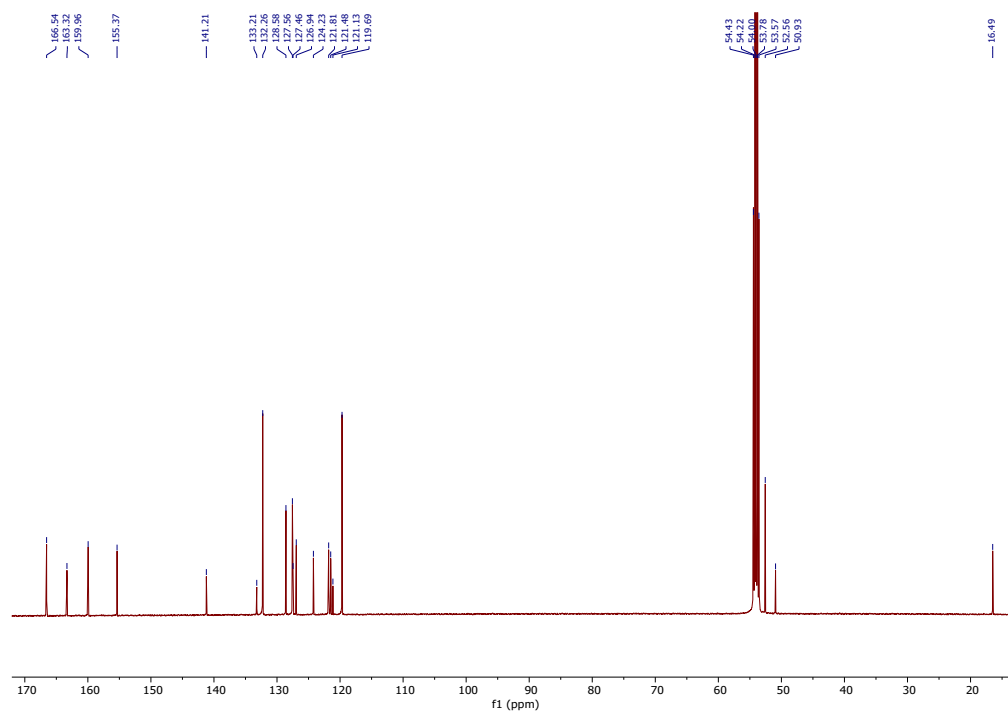

**Figure S2** Torsion calculation of PDI derivatives

Avogadro software was used to measure the twist of the PDI backbone, it was calculated as the average of the torsion angles between the carbons in both bay positions from the optimised geometry obtained by DFT.

## PDI-1

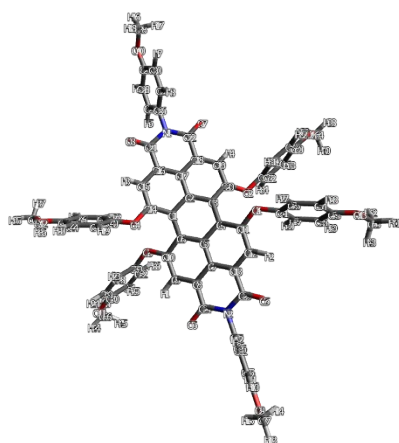

Torsion Properties

|                    | Type        | Atom 1     | Atom 2    | Atom 3    | Atom 4     | Torsion (°)    |
|--------------------|-------------|------------|-----------|-----------|------------|----------------|
| Torsion 29         | COCH        | C45        | O12       | C63       | H36        | 61.6060        |
| Torsion 122        | COCH        | C34        | O9        | C37       | H14        | 61.2932        |
| Torsion 104        | HCOC        | H17        | C38       | O10       | C29        | 61.2147        |
| Torsion 325        | COCH        | C50        | O11       | C66       | H45        | 60.6108        |
| Torsion 309        | COCH        | C60        | O14       | C64       | H39        | 60.3236        |
| Torsion 56         | CCOC        | C47        | C40       | O4        | C14        | 50.3800        |
| <b>Torsion 152</b> | <b>CCCC</b> | <b>C14</b> | <b>C1</b> | <b>C6</b> | <b>C10</b> | <b>31.4927</b> |
| <b>Torsion 176</b> | <b>CCCC</b> | <b>C11</b> | <b>C4</b> | <b>C3</b> | <b>C20</b> | <b>31.2960</b> |
| Torsion 61         | COCC        | C40        | O4        | C14       | C15        | 28.8517        |
| Torsion 153        | CCCC        | C2         | C1        | C6        | C5         | 26.5480        |
| Torsion 177        | CCCC        | C5         | C4        | C3        | C2         | 26.3039        |
| Torsion 69         | COCC        | C41        | O1        | C11       | C12        | 20.3895        |
| Torsion 272        | CCOC        | C19        | C20       | O2        | C42        | 15.5190        |
| Torsion 92         | OCCC        | O4         | C14       | C1        | C6         | 15.0624        |
| Torsion 107        | OCCC        | O1         | C11       | C4        | C3         | 13.7262        |

## PDI-2

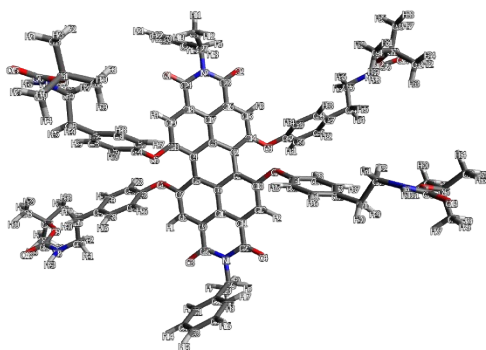

Torsion Properties

|                    | Type        | Atom 1     | Atom 2    | Atom 3    | Atom 4     | Torsion (°)    |
|--------------------|-------------|------------|-----------|-----------|------------|----------------|
| Torsion 513        | HCNH        | H46        | C69       | N4        | H48        | 36.6948        |
| Torsion 216        | HCNH        | H41        | C66       | N3        | H43        | 36.5200        |
| Torsion 182        | COCC        | C43        | O5        | C7        | C8         | 36.0821        |
| Torsion 112        | COCC        | C42        | O8        | C14       | C15        | 34.5424        |
| Torsion 94         | CCCH        | C36        | C28       | C27       | H6         | 32.7031        |
| Torsion 366        | HCCC        | H5         | C25       | C26       | C35        | 31.4762        |
| <b>Torsion 202</b> | <b>CCCC</b> | <b>C14</b> | <b>C2</b> | <b>C1</b> | <b>C13</b> | <b>30.8197</b> |
| <b>Torsion 276</b> | <b>CCCC</b> | <b>C7</b>  | <b>C5</b> | <b>C4</b> | <b>C20</b> | <b>30.5502</b> |
| Torsion 460        | CCCH        | C61        | C62       | C71       | H50        | 29.3959        |
| Torsion 266        | CCCH        | C48        | C47       | C65       | H40        | 27.7200        |
| Torsion 203        | CCCC        | C3         | C2        | C1        | C6         | 25.9736        |
| Torsion 277        | CCCC        | C6         | C5        | C4        | C3         | 25.9190        |
| Torsion 479        | CCCH        | C53        | C52       | C68       | H45        | 25.6592        |
| Torsion 233        | OCCC        | O5         | C7        | C5        | C4         | 15.6216        |
| Torsion 143        | OCCC        | O8         | C14       | C2        | C1         | 15.5513        |

## PDI-3

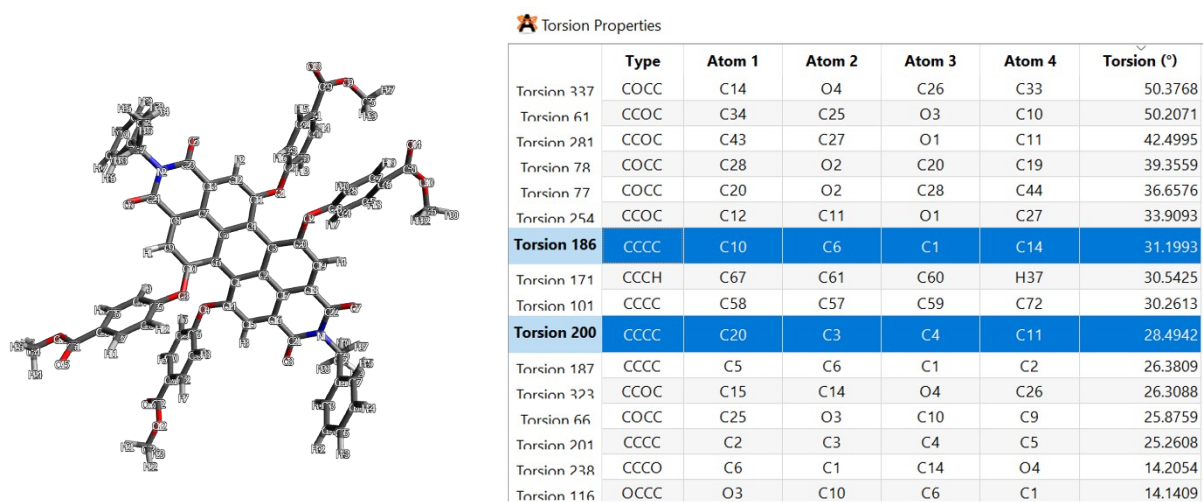

**Figure S3** Beer-Lambert plot of PDI-1, -2 and -3

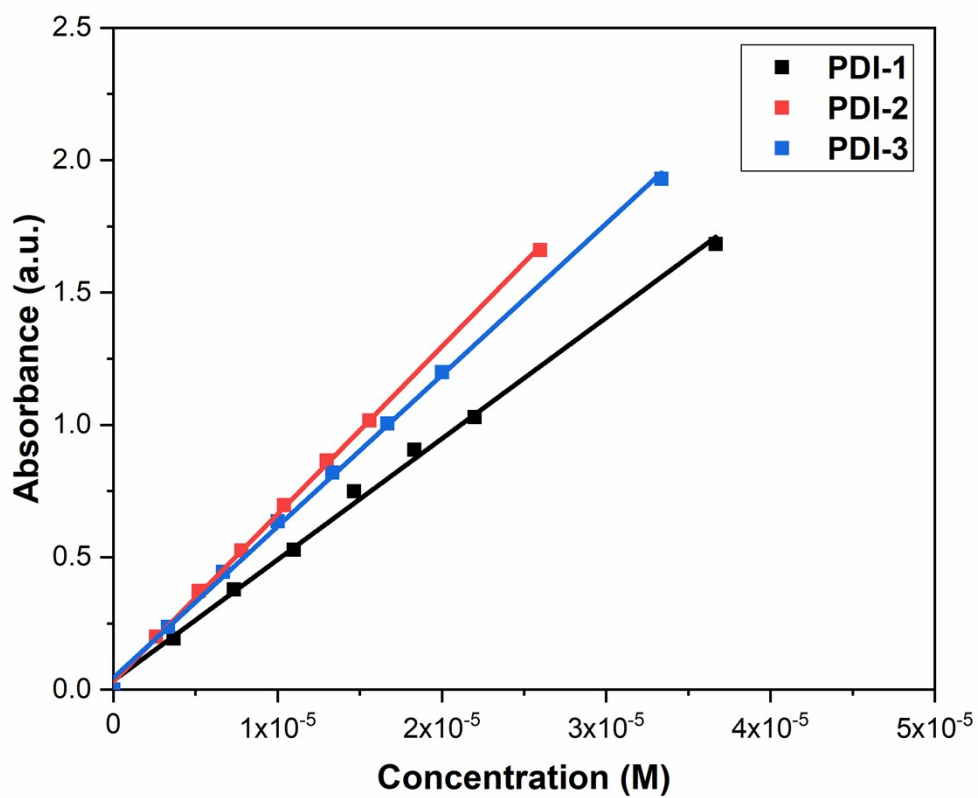

**Figure S4** Charge mobility measurement of PDIs

The electron mobilities of PDI-1, -2 and -3, were investigated through the space-charge limited current (SCLC) technique. Samples were prepared as electron-only devices in a sandwich geometry with aluminium and ZnO electrodes on an ITO coated glass. Films were obtained by spin-coating PDI solutions (20 mg/ml in chlorobenzene) at 1,000 rpm for 60 s, and their thickness was measured with a Dektak profilometer; the final device had an ITO/ZnO/PDI/Al architecture. Electron injection was carried out through the Al electrode due to higher current density. The obtained J-V curves of each PDI plotted in logarithmic scale are shown in figure S4.

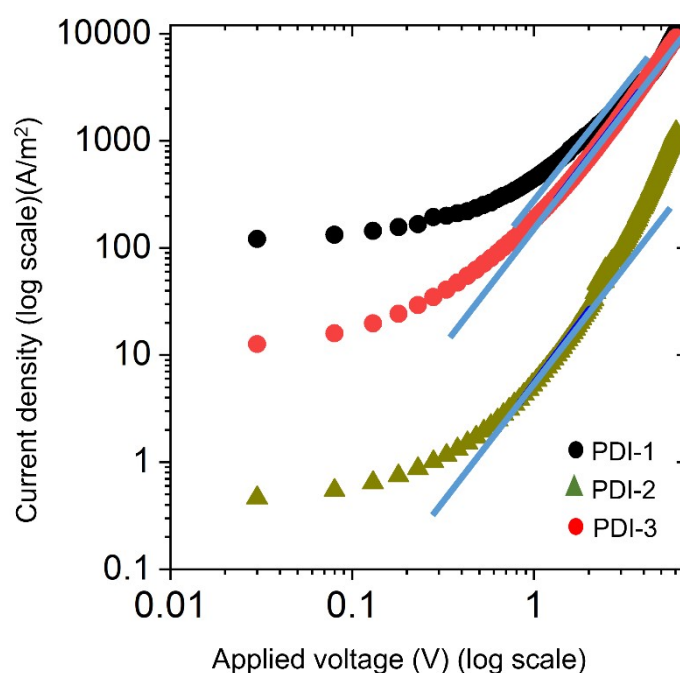

**Figure S4** J-V characteristics of the electron-only devices prepared with PDI-1, -2 and -3.

| Sample | Mobility<br>[cm²/Vs]                          | Film thickness<br>[nm] |
|--------|-----------------------------------------------|------------------------|
| PDI-1  | $3.8 \times 10^{-5} (\pm 1.6 \times 10^{-5})$ | 63.6 ( $\pm 5$ )       |
| PDI-2  | $0.9 \times 10^{-6} (\pm 0.2 \times 10^{-6})$ | 69 ( $\pm 5$ )         |
| PDI-3  | $1.6 \times 10^{-5} (\pm 3.2 \times 10^{-5})$ | 72.7 ( $\pm 5$ )       |

No evident trap-free regime was observed; therefore, the electron mobilities were estimated from the region of the curves where a straight line with an approximated slope of 2 could be fitted (depicted as the blue line on the curves). Such a region may be related to the trap-filling regime, in which the remaining traps within the material still hinder free charge mobility; however, it was not possible to clearly determine it was such a regime. From the obtained results, a tendency related to the size of the

substituents seems not only to play an important role in solubility but also in electron transport properties. PDI-1 with the less bulky substituent showed the highest mobility; in contrast, PDI-2 with the largest substituent showed the lowest mobility. Therefore, while solubility was gained for better processability, the electron mobility of the material in the solid state seems to be compromised to some extent.

**Figure S5** Performance screen of PDI-based ETMs in inverted perovskite cells

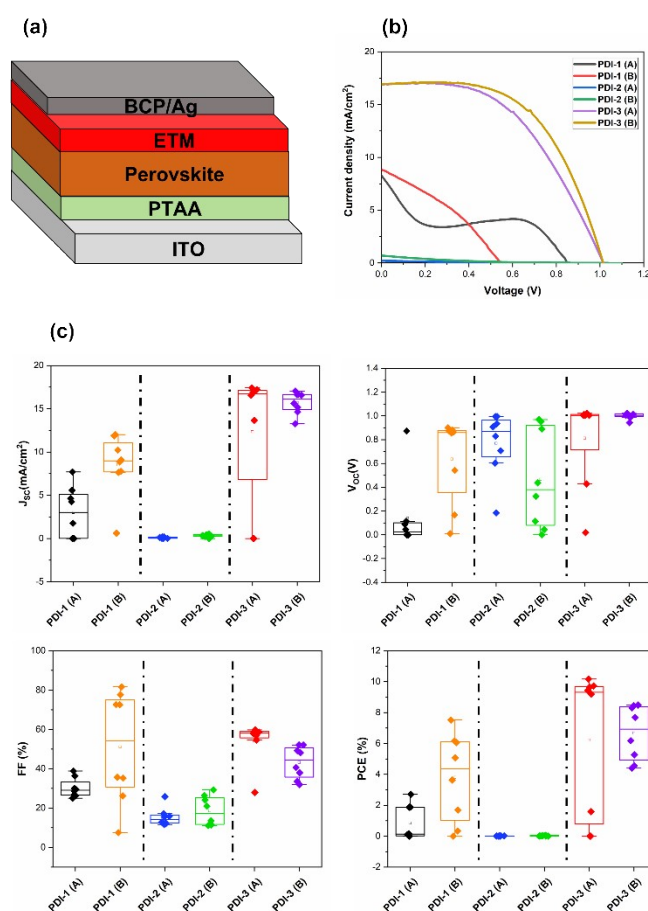

**Figure S5.** (a) Device architecture of inverted PSC on ITO-coated PET substrates. (b) J-V curves of best devices at different speed deposition, A and B represents 2,000 and 4,000 rpm, respectively. (c) Box plots of PV parameters over eight devices for each PDI.

**Figure S6** Reverse and forward scan of champion devices with PCBM and PDI-based ETMs

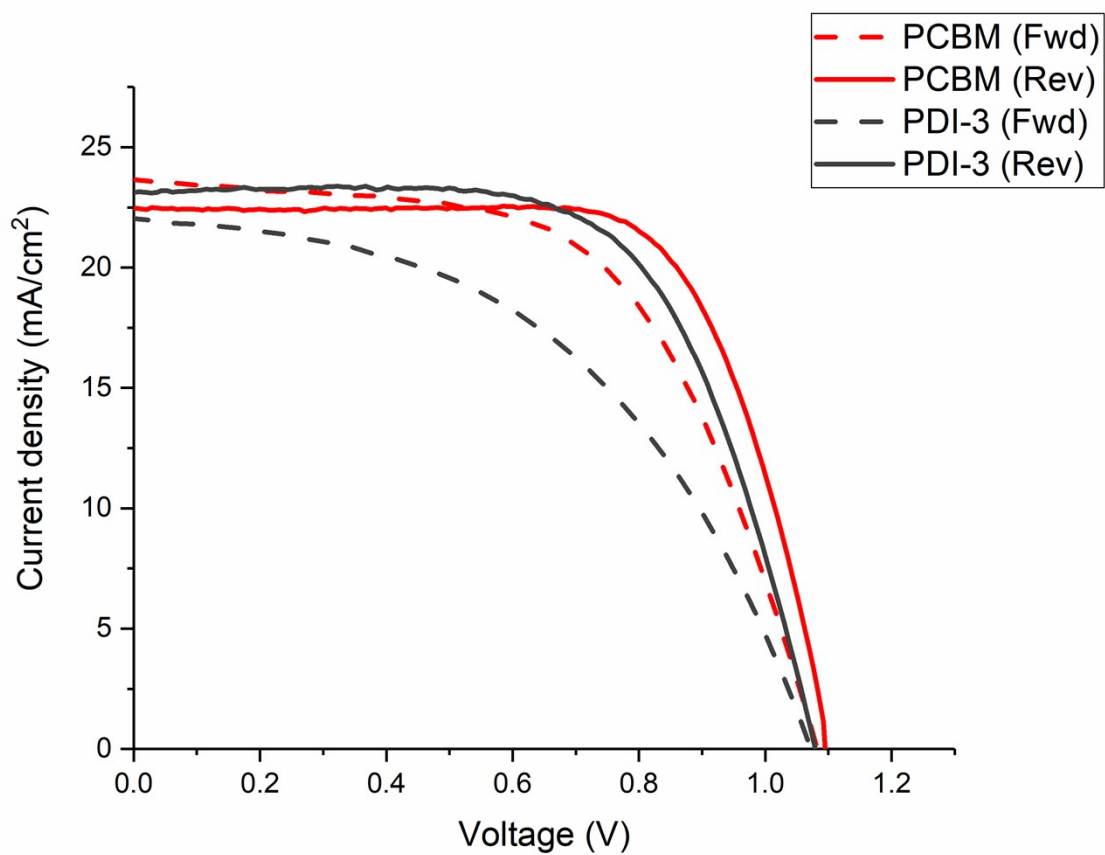

| ETM   | Scan    | J <sub>sc</sub><br>[mA/cm <sup>2</sup> ] | V <sub>oc</sub><br>[V] | FF<br>[%]      | PCE<br>[%]       |
|-------|---------|------------------------------------------|------------------------|----------------|------------------|
| PCBM  | Reverse | 22.46<br>(21.70)                         | 1.09<br>(1.08)         | 71.5<br>(70.7) | 17.30<br>(17)    |
|       | Forward | 23.50<br>(22.97)                         | 1.08<br>(1.07)         | 58.8<br>(57.6) | 14.92<br>(14.56) |
| PDI-3 | Reverse | 23.02<br>(22.80)                         | 1.08<br>(1.08)         | 67.5<br>(64.5) | 16.80<br>(16.10) |
|       | Forward | 21.73<br>(21.13)                         | 1.06<br>(1.04)         | 48.4<br>(45)   | 11.38<br>(11.16) |
